# Supplementary material for: PPARα-UGT axis activation represses intestinal FXR-FGF15 feedback signalling and exacerbates experimental colitis
Source: PubMed Central journal article supplement — Nat Commun. 2014 Sep 3;5:4573. doi: 10.1038/ncomms5573 (PMC4164778; doi:10.1038/ncomms5573), 2014-09-03
Supplement: ncomms5573-s1.pdf [file ncomms5573-s1.pdf]

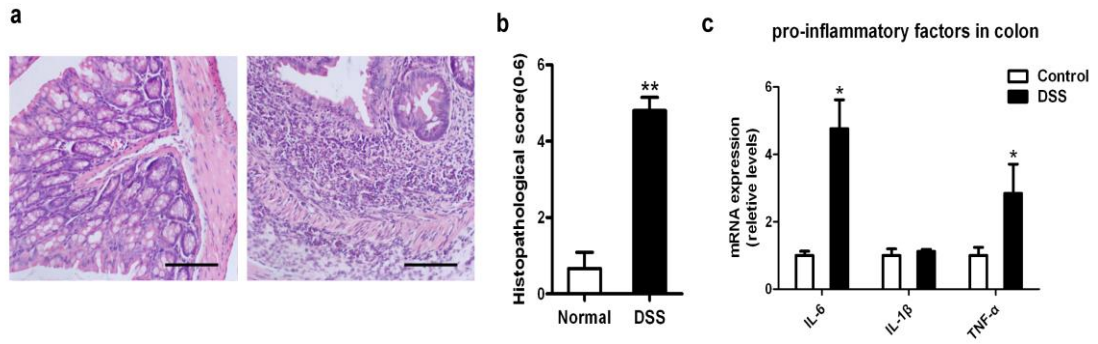

**Supplementary Fig. 1. DSS induced chronic colitis model.** (a) Hematoxylin and eosin staining of colon tissues (Scale bar, 100  $\mu$ m). (b) Histopathological scores. (c) The mRNA expression of *IL-6*, *IL-1 $\beta$* , and *Tnf- $\alpha$*  in colon. Results are mean  $\pm$  s.e.m (n=6; \*  $P$ <0.05; \*\*  $P$ <0.01; VS control, Student's  $t$  test).

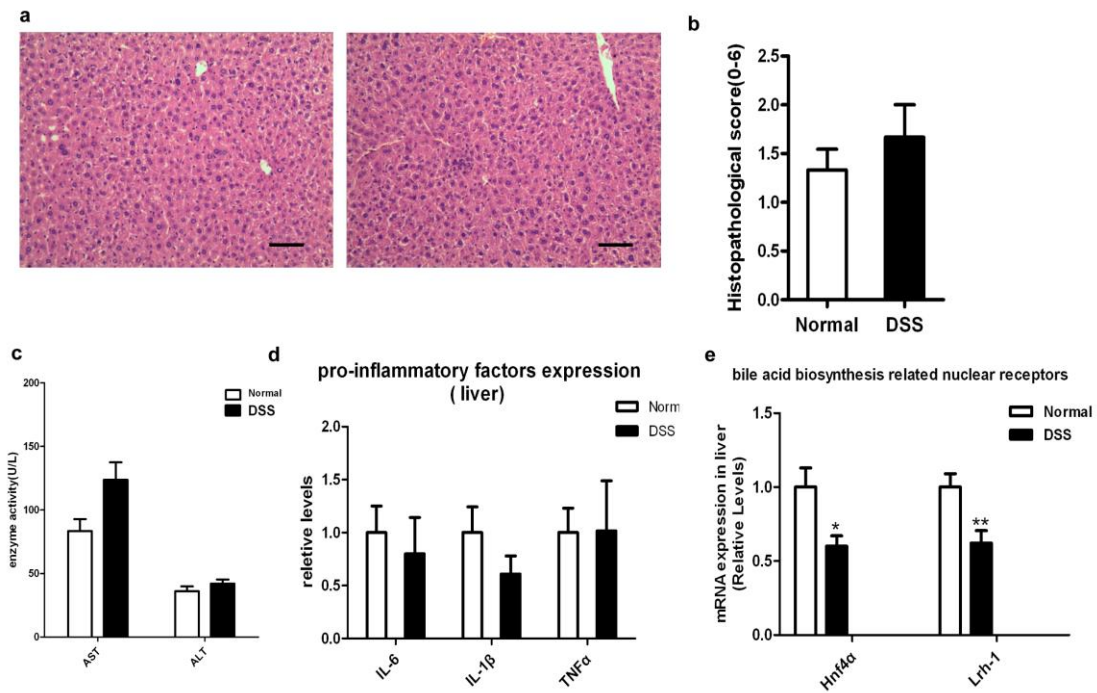

**Supplementary Fig. 2. Characterization of *Cyp7a1* positive transcriptional factors in liver.** (a) Hematoxylin and eosin staining of liver (Scale bar, 100  $\mu$ m). (b) Histopathological scores. (c) Analysis of biochemical parameters indicative of liver damage (serum AST, and ALT activities). (d) The mRNA expression of *IL-6*, *IL-1 $\beta$* , and *Tnf- $\alpha$*  in liver. (e) The expression of genes in the transcriptional activation pathway of bile acids synthesis, as quantified by qRT-PCR. Results of quantitative analysis values are expressed as mean  $\pm$  s.e.m (n=6) and are plotted as fold change. \* $P$ <0.05, \*\* $P$ <0.01, VS normal control, Student's  $t$  test.

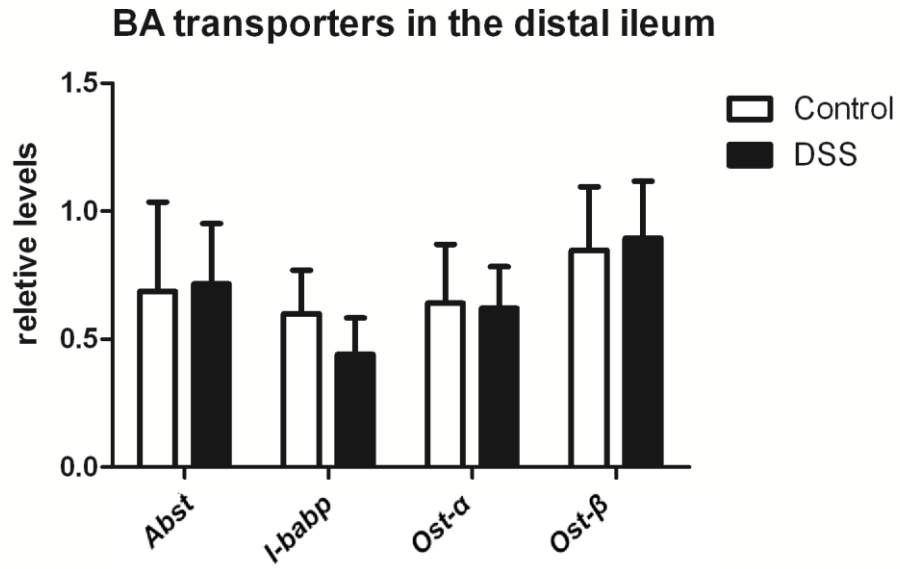

**Supplementary Fig.3. Characterization of intestinal transporters of bile acids.** The mRNA expression of *Asbt*, *Ost $\alpha$* , and *Ost $\beta$*  and the intracellular bile acids binding protein *Ibabp* in distal ileum. Results are mean  $\pm$  s.e.m (n=6).

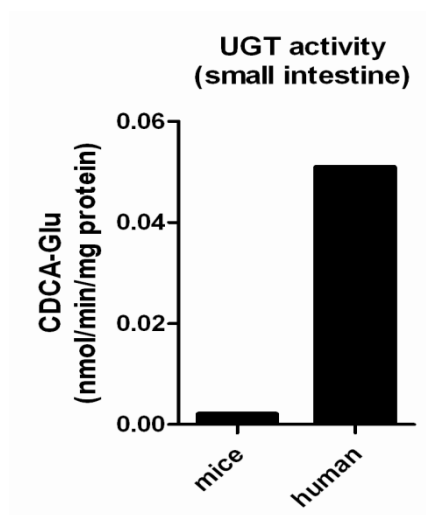

**Supplementary Fig. 4. Glucuronidation of CDCA in human intestinal S9.**

Intestinal UGT activities toward CDCA were determined in pooled mice intestinal S9 (n=6) and pooled human intestinal S9 (BD Biosciences, Bedford, MA, USA). Results represent the mean of triplicate determinations.

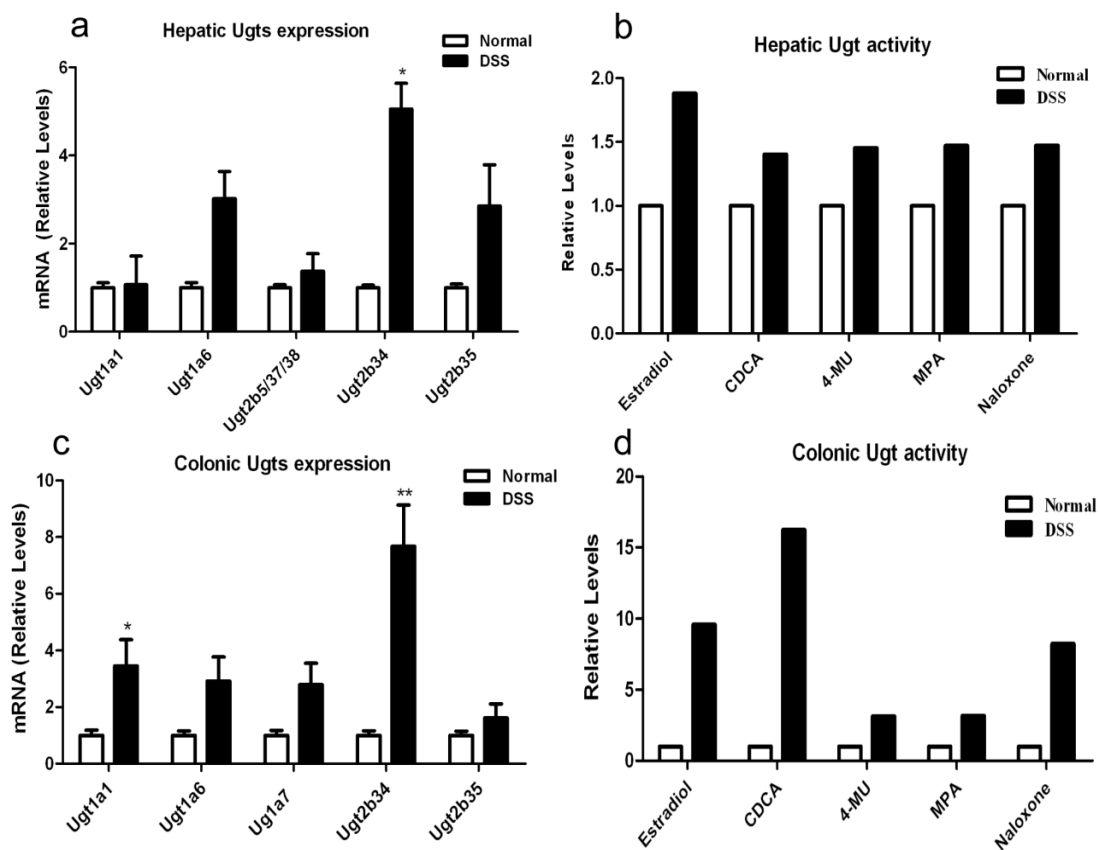

**Supplementary Fig. 5. Disturbance of hepatic and colonic UGTs in colitis mice.** The mRNA expression and activity of *Ugt1a1*, *Ugt1a6*, *Ugt1a7*, *Ugt2b34*, and *Ugt2b35* in mice liver (a, b) and colon (c, d). Results of mRNA expression are mean  $\pm$  s.e.m and are plotted as fold change (n=6; \*,  $P < 0.05$ ; \*\*,  $P < 0.01$ ; VS control, Student's *t* test). UGT activities toward each substrate were determined in pooled S9 (n=6). Results represent the mean of triplicate determinations.

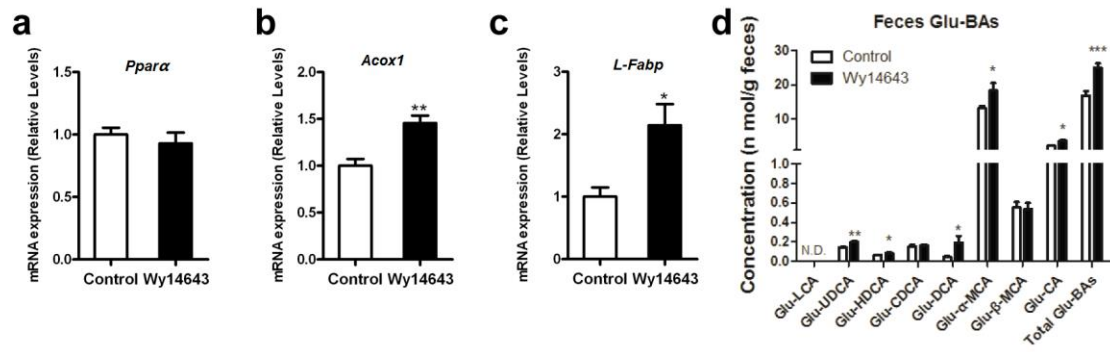

**Supplementary Fig. 6. Wy14643 activates PPAR $\alpha$  and promotes bile acid glucuronidation.** (a)-(c) The mRNA expression of *Ppara*, *Acox1*, and *L-Fabp* in the distal ileum of control and Wy14643-treated mice;(d) Bile acid glucuronides in feces. Results are mean  $\pm$  s.e.m of 8 mice. \* $P$ <0.05, \*\* $P$ <0.01 VS control, Student's  $t$  test.

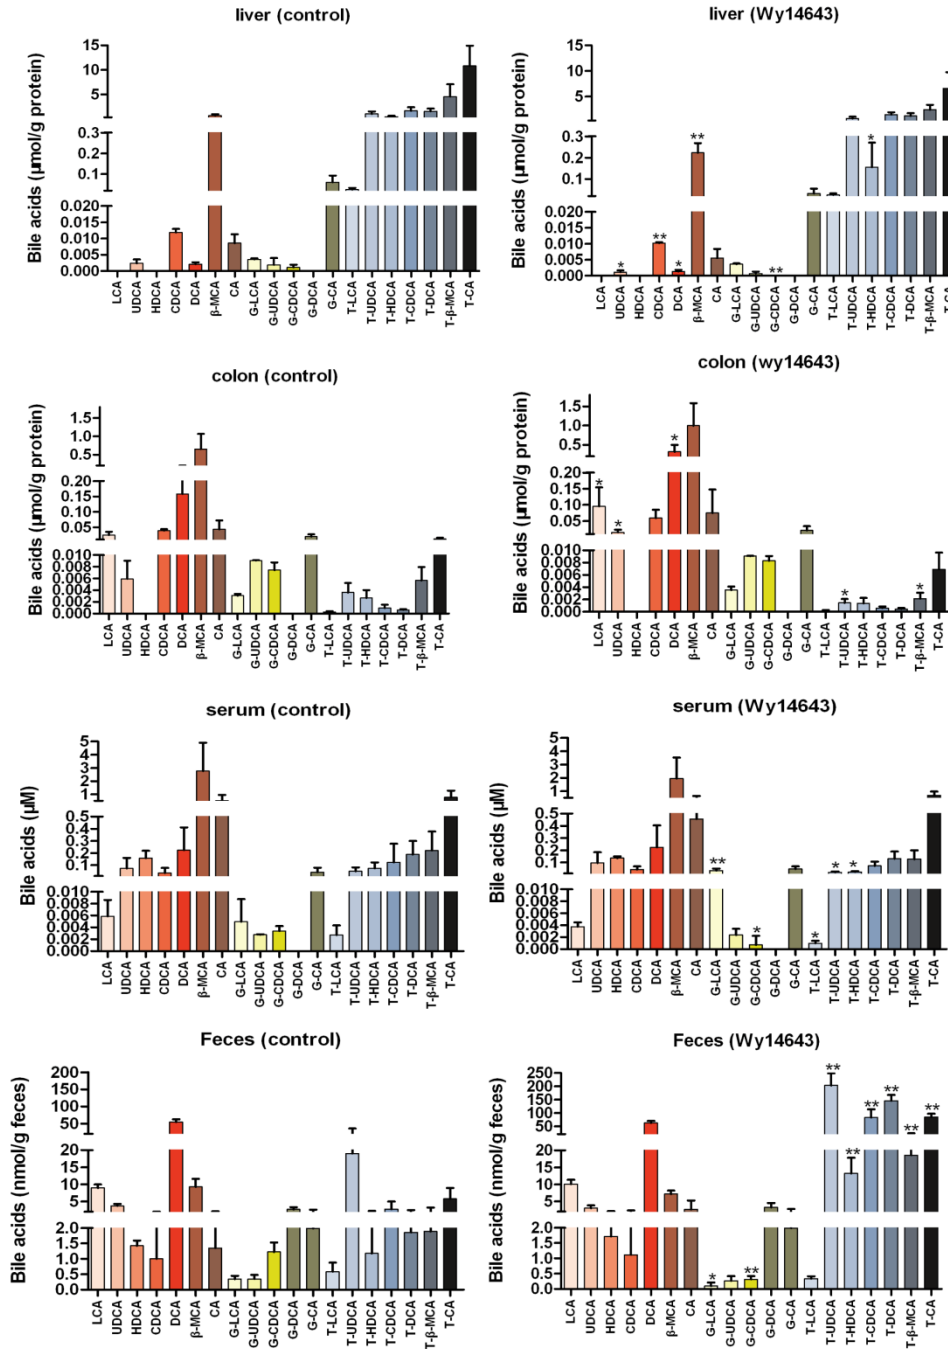

**Supplementary Fig. 7. PPAR $\alpha$  activation by Wy14643 disrupts bile acid homeostasis.** Compartmental bile acid profiles of control and Wy14643-treated mice using UFLC-Triple-TOF analysis. Results are mean  $\pm$  s.e.m of 8 mice, \* $P$ <0.05, \*\* $P$ <0.01 VS control, Student's  $t$  test. CA, cholic acid; LCA, lithocholic acid; HDCA, hyodeoxycholic Acid; UDCA, ursodeoxycholic acid; CDCA, chenodeoxycholic acid; DCA, deoxycholic acid; MCA, muricholic acid; T, tauro-conjugated species; G, glyco-conjugated species.

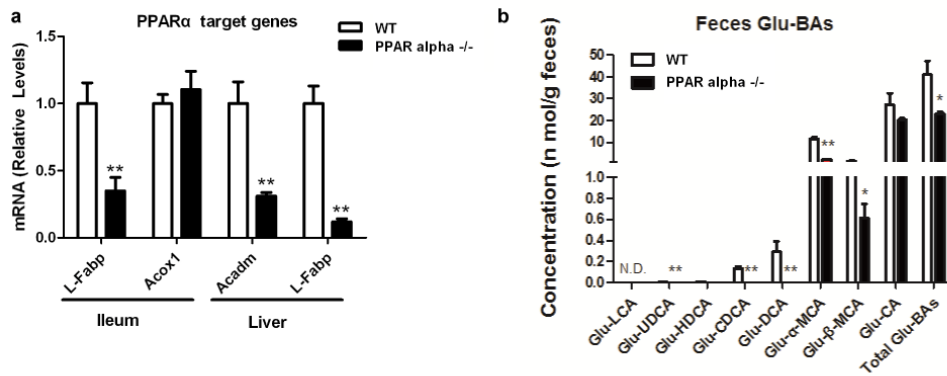

**Supplementary Fig. 8. *Ppara*-null mice show reduced glucuronidation of bile acids.** (a) The mRNA expression of *Acox1*, *L-Fabp* in the ileum and *Acadm* and *L-Fabp* in the liver of control and *Ppara* $-/-$  mice. (b) Bile acid glucuronides in feces. Results of quantitative analysis values are expressed as means  $\pm$  s.e.m (n=6) and are plotted as fold change. \* $P$ <0.05, \*\* $P$ <0.01 VS WT, Student's  $t$  test.



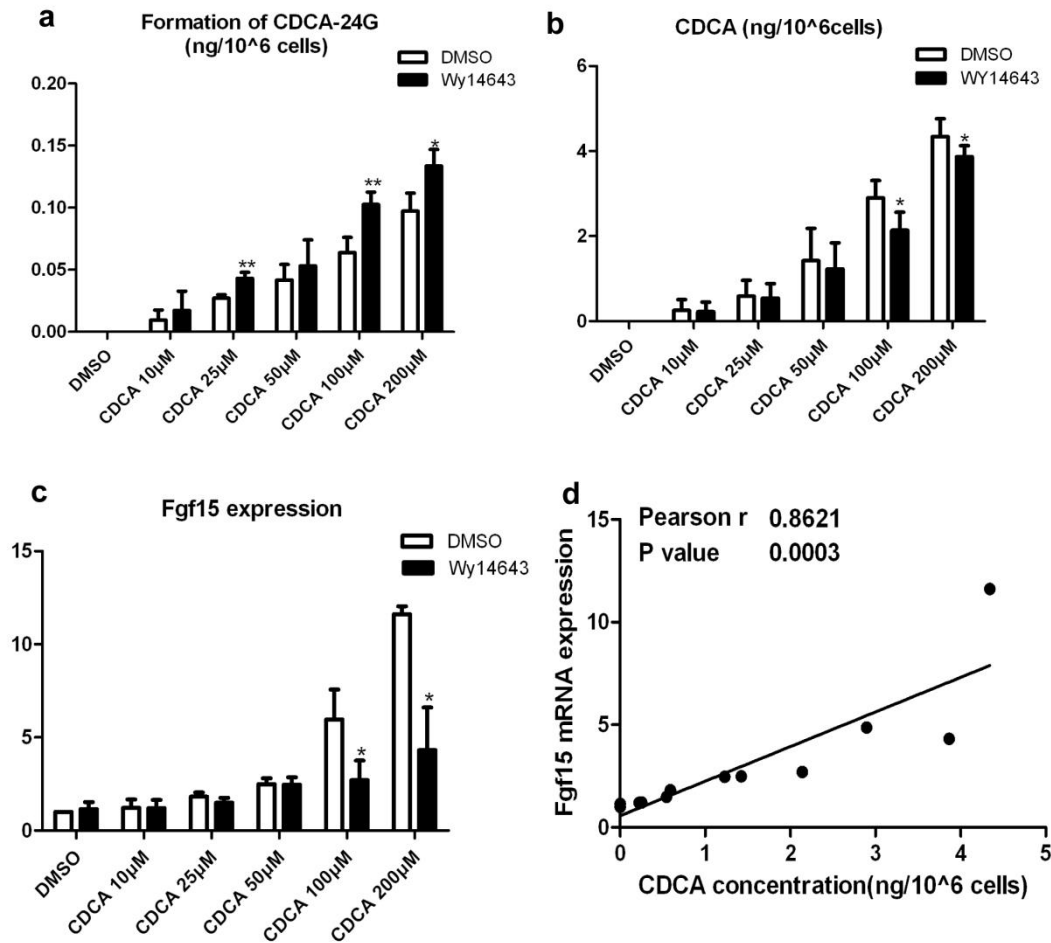

**Supplementary Fig. 9. Cellular disposition of CDCA and FXR-FGF15 signaling in IEC-6 cells.** (a) Formation of CDCA-24G in IEC-6 cell line treated with different concentrations of CDCA. (b) Intra-cellular concentration of CDCA in IEC-6 cell line treated with different concentrations of CDCA. (c) The mRNA expression of *Fgf15* in the IEC-6 cell line treated with different concentrations of CDCA. (d) The correlation of CDCA concentration and the expression of *Fgf15*. Results are the mean  $\pm$  s.e.m of three independent experiments and are plotted as fold change, \* $P < 0.05$ , \*\* $P < 0.01$  VS DMSO, Student's *t* test.

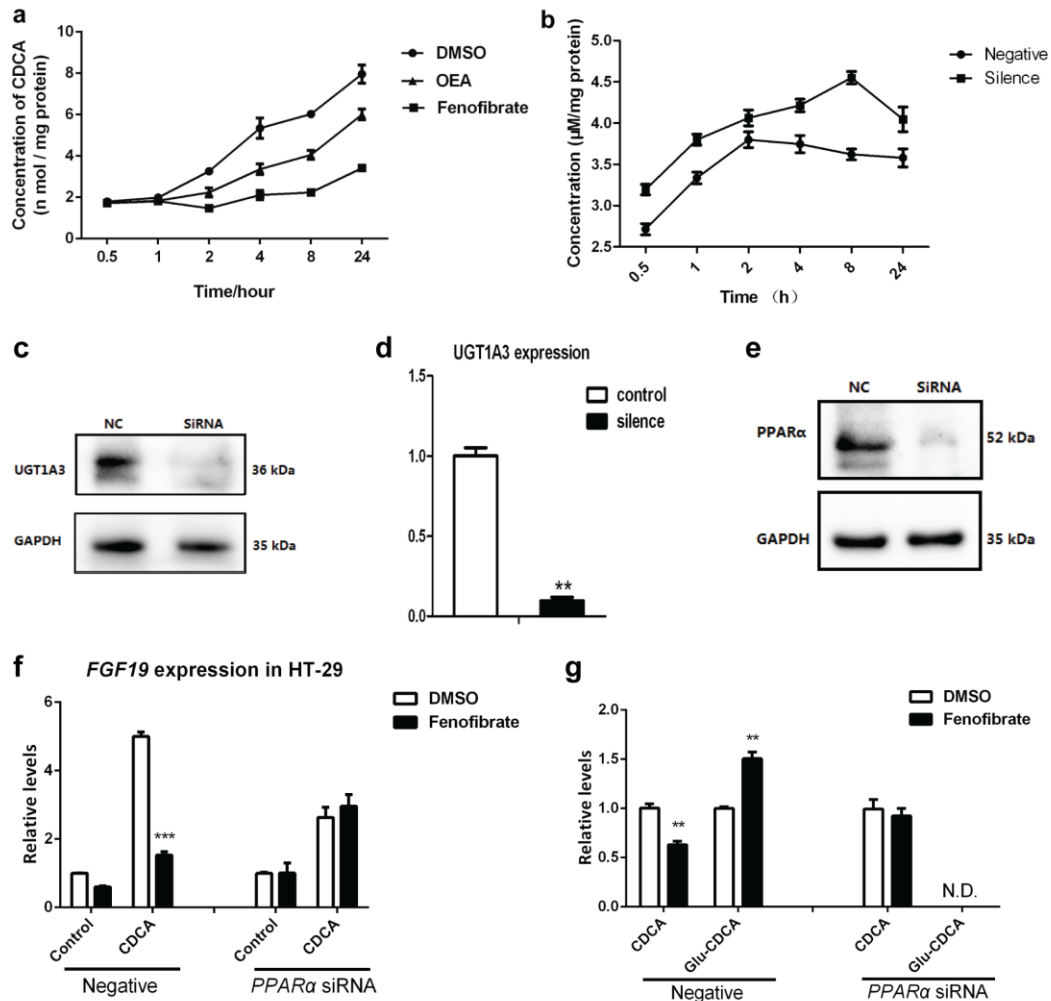

**Supplementary Fig. 10. PPAR $\alpha$ -UGT1A3 determines the cellular disposition of CDCA in HT29 cells.** (a-b) HT29 Cells were incubated with 50  $\mu$ M CDCA in the absence or presence of PPAR $\alpha$  agonist (a) or UGT1A3 Stealth RNAi (b) for 0.5, 1, 2, 4, 8, and 24 hours. (c-d) Verification of the transfection efficiency of *UGT1A3* stealth RNAi in HT29 cells. (c) Western Blot and (d) qRT-PCR analysis of *UGT1A3*. (e-g) HT29 cells were transfected with PPAR $\alpha$  siRNA or negative control siRNA. (e) Western Blot analysis of PPAR $\alpha$ . (f) PPAR $\alpha$ -dependent effect of fenofibrate in *FGF19* expression. (g) PPAR $\alpha$ -dependent effect of fenofibrate in CDCA cellular disposition. The intracellular accumulation of CDCA and its glucuronide was detected using LC-MS analysis. Results are mean  $\pm$  s.e.m of three independent experiments and are plotted as fold change. \*\* $P < 0.01$  VS control, Student's *t* test.

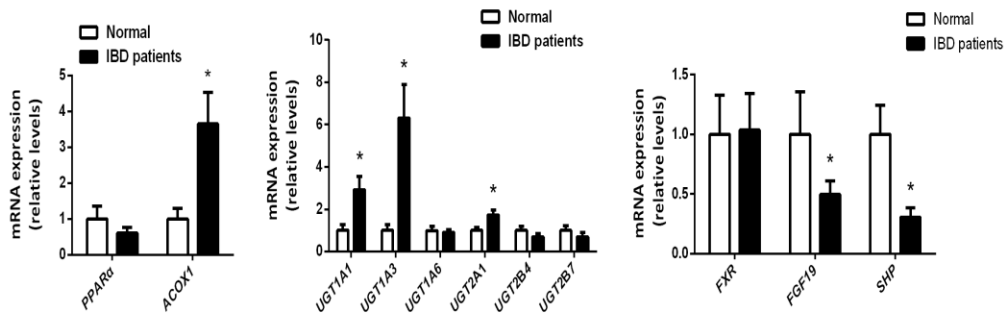

**Supplementary Fig. 11. Colon biopsies from IBD patients show upregulated intestinal PPAR $\alpha$ -UGTs and decreased FXR-FGF19 signaling.** RNA extracts were prepared from the colon biopsies of 8 healthy humans and 13 IBD patients (5 ulcerative colitis and 8 Crohn's disease patients). (a) The mRNA expression of *PPAR $\alpha$*  and *ACOX1*. (b) The mRNA expression of *UGTs*. (c) The mRNA expression of *FXR*, *FGF19* and *SHP*. Data represent the mean  $\pm$  s.e.m. \* $P < 0.05$ , \*\* $P < 0.01$  VS normal control, Student's *t* test.

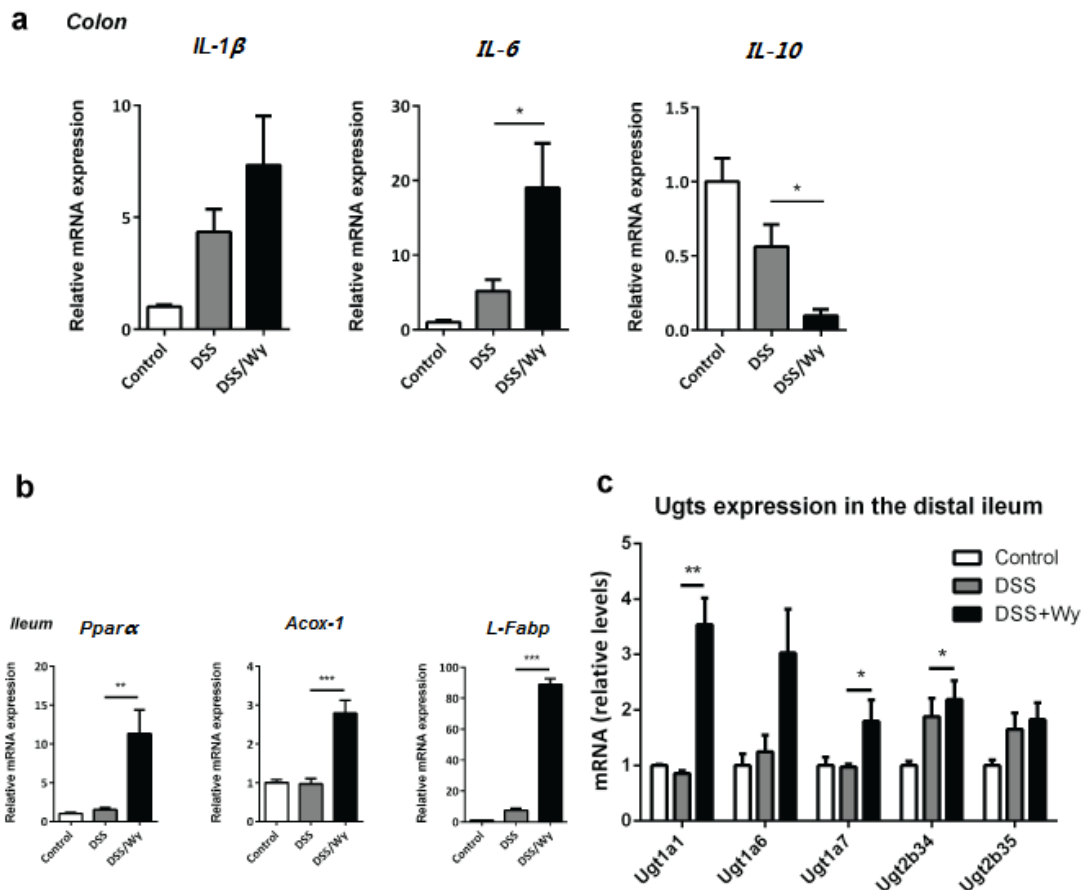

**Supplementary Fig. 12. Wy14643 treatment aggravates DSS-induced colitis.** (a) The mRNA expression of cytokines in colon. (b) The mRNA expression of *Ppara*, *Acox-1* and *L-Fabp*. (c) The mRNA expression of *Ugts* in the distal ileum. Results are means  $\pm$  s.e.m of 6 mice. \* $P < 0.05$ , \*\* $P < 0.01$ , VS DSS, Student's *t* test.

Fig 2b.

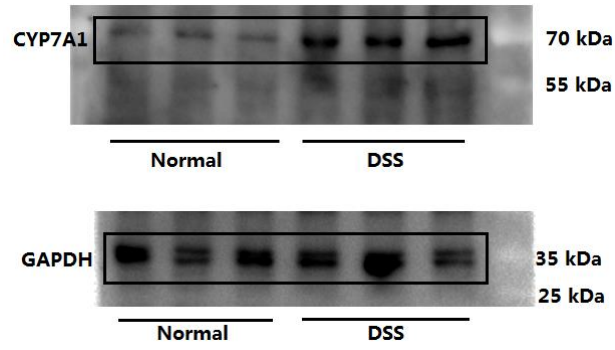

Fig 4e.

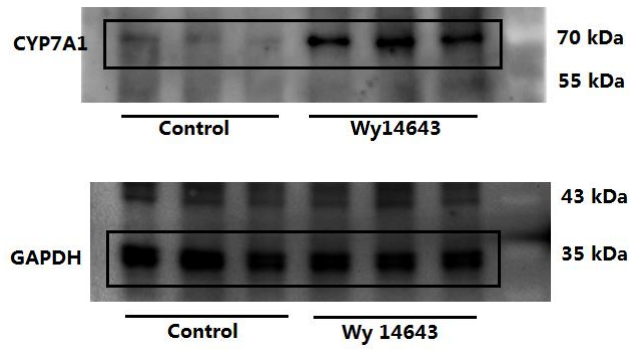

Fig 8f.

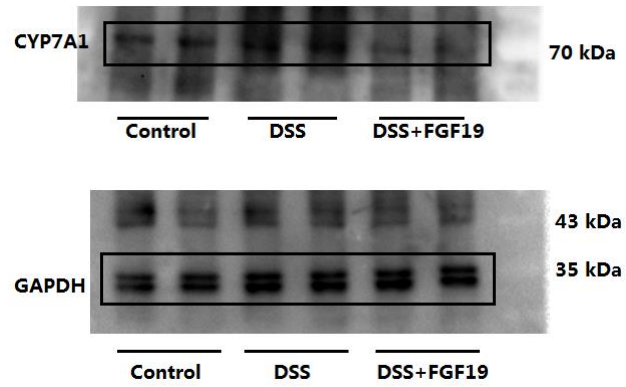

Supplementary Fig. 13. Unedited immunoblotting images in this study.

**Supplementary Table 1. Incubation conditions and UGT activities of  
normal and DSS-treated mice**

| Substrates | Incubation Conditions |       |            | UGT activities (nmol/min/mg protein) |      |                 |         |         |        |
|------------|-----------------------|-------|------------|--------------------------------------|------|-----------------|---------|---------|--------|
|            | S9                    | Time  | Substrate  | Liver                                |      | Small intestine |         | colon   |        |
|            | (mg/ml)               | (min) | ( $\mu$ M) | Normal                               | DSS  | Normal          | DSS     | Normal  | DSS    |
| Estradiol  | 0.4                   | 30    | 20         | 0.10                                 | 0.19 | 0.0024          | 0.0074  | 0.0017  | 0.016  |
| CDCA       | 1                     | 60    | 50         | 0.142                                | 0.20 | 0.0020          | 0.0080  | 0.0022  | 0.035  |
| 4-MU       | 0.1                   | 15    | 100        | 13.6                                 | 19.8 | 3.90            | 11.07   | 2.50    | 7.85   |
| MPA        | 0.2                   | 30    | 200        | 1.61                                 | 2.37 | 0.13            | 0.24    | 0.12    | 0.39   |
| Naloxone   | 0.5                   | 60    | 20         | 0.28                                 | 0.41 | 0.00022         | 0.00071 | 0.00025 | 0.0020 |

Colitis was induced by administration of 2.5% (w/v) DSS in drinking water for 7 days and a 14 days washout with drinking water for 3 cycles. Results of UGT activity were determined toward various substrates in pooled mice S9 (n=6) and are presented as the mean of triplicate determinations.

**Supplementary Table 2. Primer sequences for qRT-PCR (mice)**

| <b>Gene</b>           | <b>Sequence</b>                                      |
|-----------------------|------------------------------------------------------|
| <b><i>Cyp7a1</i></b>  | TACTAGATAGCATCATCAAGGAGGCTC<br>CCATCCTCAAGGTGCAGAGTG |
| <b><i>Cyp7b1</i></b>  | GAGCCTATCTACTTCTACAA<br>TTCTGTGTTCCAATCTGT           |
| <b><i>Cyp8b1</i></b>  | GATAGGGGAAGAGAGCCACC<br>TCCTCAGGGTGGTACAGGAG         |
| <b><i>Cyp27a1</i></b> | GAAGCCATCACCTATATC<br>ATAGACTGAGTTCTGGAA             |
| <b><i>Fgf15</i></b>   | CAGTCTTCCTCCGAGTAGCG<br>TGAAGACGATTGCCATCAAG         |
| <b><i>Fxr</i></b>     | GCACGCTGATCAGACAGCTA<br>CAGGAGGGTCTGTTGGTCTG         |
| <b><i>Hnf4α</i></b>   | GCTGTCCTCGTAGCTTGACC<br>TTAAGAAGTGCTTCCGGGCT         |
| <b><i>I-Babp</i></b>  | CCTTCAGTGGCAAATATG<br>GACCTCTGTGATGATCTT             |
| <b><i>Lrh-1</i></b>   | TCAAGAGCTCACTCCAGCAG<br>TTGAGTGGGCCAGGAGTAGT         |
| <b><i>Shp</i></b>     | GTACCTGAAGGGCACGATCC<br>GTGAAGTCTTGGAGCCCTGGT        |

|                                         |                                                      |
|-----------------------------------------|------------------------------------------------------|
| <b><i>Il-6</i></b>                      | ATCCAGTTGCCTTCTTGGGACTGA<br>TAAGCCTCCGACTTGTGAAGTGGT |
| <b><i>IL-1<math>\beta</math></i></b>    | CCTCGTGCTGTCGGACCCAT<br>TCCAGCTGCAGGGTGGGTGT         |
| <b><i>TNF-<math>\alpha</math></i></b>   | AGGGTCTGGGCCATAGAACT<br>CCACCACGCTCTTCTGTCTAC        |
| <b><i>Fgfr4</i></b>                     | GTACCCTCGGACCGCGGCACATAC<br>GCCGAAGCTGCTGCCGTTGATG   |
| <b><i><math>\beta</math>-Klotho</i></b> | CGAGCCCATTGTTACCTTGT<br>CTCCAAAGGTCTGGAAGCAG         |
| <b><i>Ugt1a1</i></b>                    | ATGGCTTTCTTCTCCGGAAT<br>TCAGAAAAGCCCCTATCCC          |
| <b><i>Ugt1a6</i></b>                    | CACCGGAACTAGACCATCGAA<br>GCATCATCACCATCGGAACTC       |
| <b><i>Ugt1a7c</i></b>                   | TGCAATGGAGTTCCGATGGT<br>CTGGAGAGGCGCATGATGTT         |
| <b><i>Ugt2b34</i></b>                   | GGAGAATGCCATGCGGTTAT<br>CTGCCACACGAAGATGCTTG         |
| <b><i>Ugt2b35</i></b>                   | GTGGCGCGAATGGACTCTAT<br>TCTCAGGTGCTTGGCTCCTT         |
| <b><i>Ugt2b5/37/38</i></b>              | TGGCCGATGGAATTCAGTC<br>GTTTCAAACCTTAAGGCCAGGTG       |



|                      |                                                   |
|----------------------|---------------------------------------------------|
| <b><i>Acox1</i></b>  | TGAGGCGCCAGTCTGAAATC<br>CCGTCTGCAGCATCATAACA      |
| <b><i>L-Fabp</i></b> | GCAGAGCCAGGAGAACTTTGAG<br>TTTGATTTTCTTCCCTTCATGCA |
| <b><i>Ppara</i></b>  | CAGTGGGGAGAGAGGACAGA<br>AGTTCGGGAACAAGACGTTG      |
| <b><i>Asbt</i></b>   | GGA ACTGGCTCCAATATCCTG<br>GTTCCCGAGTCAACCCACAT    |
| <b><i>Osta</i></b>   | GTCTCAAGTGATGAACTGCCA<br>TTGAGTGCTGAGTCCAGGTC     |
| <b><i>Ostβ</i></b>   | GTATTTTCGTGCAGAAGATGCG<br>TTTCTGTTTGCCAGGATGCTC   |
| <b><i>Gapdh</i></b>  | TTGATGGCAACAATCTCCAC<br>CGTCCCGTAGACAAAATGGT      |

**Supplementary Table 3. Primer sequences for qRT-PCR (human)**

| <b>Genes</b>                          | <b>Sequence</b>                                  |
|---------------------------------------|--------------------------------------------------|
| <b><i>PPAR<math>\alpha</math></i></b> | ATGGTGGACACGGAAAGCC<br>CGATGGATTGCGAAATCTCTTGG   |
| <b><i>ACOX-1</i></b>                  | ACTCGCAGCCAGCGTTATG<br>AGGGTCAGCGATGCCAAAC       |
| <b><i>FXR</i></b>                     | GACTTTGGACCATGAAGACCAG<br>GCCCAGACGGAAGTTTCTTATT |
| <b><i>FGF19</i></b>                   | ATCTCCTCCTCGAAAGCACA<br>CAGCGTGCGGTACCTCTG       |
| <b><i>UGT1A1</i></b>                  | TTGTCTGGCTGTTCCCCTTA<br>GGTCCGTCAGCATGACATCA     |
| <b><i>UGT1A3</i></b>                  | GATTTTGCCCAAAGCATCAG<br>TGCCAACAGGAAGCCACTAT     |
| <b><i>UGT1A6</i></b>                  | TGCCCAACATGGTCTTCATT<br>CCACAATTCCATGTTCTCCA     |
| <b><i>UGT2A1</i></b>                  | AACCACTCTTGGTGGGAATGT<br>AGATGGGTTAGAGGTTGGTGT   |
| <b><i>UGT2B4</i></b>                  | ACTCAATGCACTGAAGACAGTAAT<br>GATCAAGGGGCTTCACTGGT |
| <b><i>UGT2B7</i></b>                  | GGTGTTTTCTCTGGGGTCAA<br>TCCCATCAAATCTCCACAGA     |
| <b><i>GAPDH</i></b>                   | AATGAAGGGGTCATTGATGG<br>AAGGTGAAGGTCGGAGTCAA     |

**Supplementary Table 4. Primer sequences for qRT-PCR (rat)**

| <b>Genes</b>        | <b>Sequence</b>                                |
|---------------------|------------------------------------------------|
| <b><i>Fgf15</i></b> | ACGGGCTGATTCGCTACTC<br>TGTAGCCCAAACAGTCCATTTCT |
| <b><i>Gapdh</i></b> | TGACTTCAACAGCAACTC<br>CCATATTCATTGTCATACCAG    |

**Supplementary Table 5. Stealth RNAi (*Ugt1a3*) and siRNA (*Ppara*)**

**sequences**

| <b>Genes</b>         | <b>Sequence</b>                                       |
|----------------------|-------------------------------------------------------|
| <b><i>Ugt1a3</i></b> | CAGGCACCUGAAUGCUACUUCUUU<br>AAAGGAAGUAGCAUUCAGGUGCCUG |
| <b><i>Ppara</i></b>  | GCGUAUGGAAAUGGGUUUATT<br>UAAACCCAUUUCCAUACGCTT        |

**Supplementary Table 6. Chromatographic and mass spectrometric parameters for the quantification of bile acids**

| <b>Bile acids</b> | <b>Retention time (min)</b> | <b>[M-H]<sup>-</sup></b> | <b>Fragment ions at Q3</b>         |
|-------------------|-----------------------------|--------------------------|------------------------------------|
| LCA               | 27.83                       | 375.291                  | 375.291, 279.2335                  |
| UDCA              | 16.21                       | 391.285                  | 391.285, 373.274, 345.2805         |
| HDCA              | 17.68                       | 391.285                  | 391.285, 373.274                   |
| CDCA              | 25.55                       | 391.285                  | 391.285, 345.2805                  |
| DCA               | 25.81                       | 391.285                  | 391.285, 345.2805                  |
| α-MCA             | 6.75                        | 407.281                  | 407.281, 389.2699, 371.2595        |
| β-MCA             | 7.30                        | 407.281                  | 407.281, 389.2699, 371.2595        |
| CA                | 18.82                       | 407.281                  | 407.281, 343.2638,                 |
| G-LCA             | 26.61                       | 432.312                  | 432.312, 74.025, 388.322           |
| G-UDCA            | 17.55                       | 448.307                  | 448.307, 74.025, 386.3057          |
| G-CDCA            | 25.48                       | 448.307                  | 448.307, 74.025, 386.3057          |
| G-DCA             | 25.70                       | 448.307                  | 448.307, 74.025, 404.3167, 345.28  |
| G-CA              | 21.35                       | 464.301                  | 464.301, 74.025, 402.301           |
| T-LCA             | 26.83                       | 482.295                  | 482.295, 79.957, 106.981, 124.007  |
| T-UDCA            | 20.55                       | 498.289                  | 498.289, 79.957, 106.981, 124.007  |
| T-HDCA            | 23.17                       | 498.289                  | 498.289, 79.957, 106.981, 124.007  |
| T-CDCA            | 25.73                       | 498.289                  | 498.289, 79.957, 106.981, 124.007  |
| T-DCA             | 25.93                       | 498.289                  | 498.289, 79.957, 106.981, 124.007  |
| T-β-MCA           | 12.48                       | 514.284                  | 514.284, 79.957, 106.981, 124.007  |
| T-CA              | 23.99                       | 514.284                  | 514.284, 79.957, 106.981, 124.007  |
| Glu-LCA           | 26.68                       | 552.320                  | 552.320, 375.289, 175.028, 113.028 |
| Glu-UDCA          | 20.62                       | 567.313                  | 567.313, 391.284, 175.028, 113.028 |
| Glu-HDCA          | 23.19                       | 567.313                  | 567.313, 391.284, 175.028, 113.028 |
| Glu-CDCA          | 25.79                       | 567.313                  | 567.313, 391.284, 175.028, 113.028 |
| Glu-DCA           | 26.08                       | 567.313                  | 567.313, 391.284, 175.028, 113.028 |
| Glu-α-MCA         | 13.26                       | 583.312                  | 407.279, 175.028, 113.028          |
| Glu-β-MCA         | 13.46                       | 583.312                  | 407.279, 175.028, 113.028          |
| Glu-CA            | 24.80                       | 583.312                  | 407.279, 175.028, 113.028          |
| dhCA (IS)         | 4.00                        | 401.233                  | 249.233                            |
